# Supplementary material for: Sex-related differences in lipid peroxidation and photoprotection in Pistacia lentiscus
Source: PubMed Central journal article supplement (PMC3935561; doi:10.1093/jxb/ert446), 2013-12-30

## Supporting Information

### Sex-related differences in lipid peroxidation and photoprotection in *Pistacia lentiscus*

Marta Juvany, Maren Müller, Marta Pintó-Marijuan, and Sergi Munné-Bosch

**Table S1** Climatological conditions at midday (photosynthetically-active photon flux density [PPFD], air temperature [ $T_{\text{air}}$ ] and relative humidity [RH]) during the measurements of Experiment 1.

| Season | Date       | PPFD<br>( $\mu\text{mol m}^{-2} \text{s}^{-1}$ ) | $T_{\text{air}}$ ( $^{\circ}\text{C}$ ) | RH (%) |
|--------|------------|--------------------------------------------------|-----------------------------------------|--------|
| Spring | 28 March   | 1442                                             | 23.0                                    | 25     |
| Summer | 18 July    | 1940                                             | 32.0                                    | 38     |
| Autumn | 29 October | 1152                                             | 14.5                                    | 36     |
| Winter | 24 January | 876                                              | 10.0                                    | 52     |

**Fig. S1** Seasonal variations in climatological conditions (monthly average air temperature [ $T_{air}$ ], monthly average relative humidity and monthly precipitation) from March 2012 to February 2013.

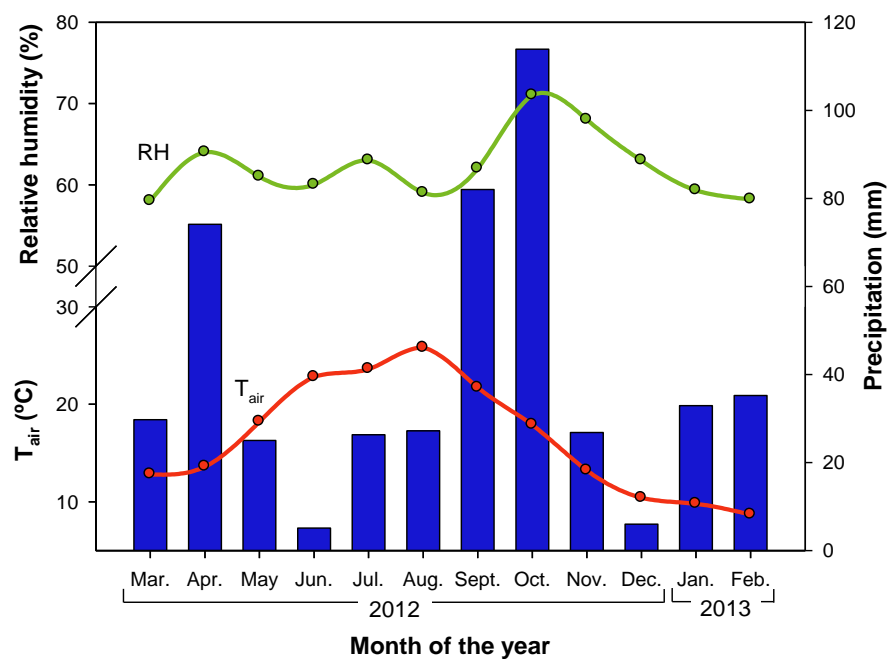

**Fig. S2** Sex-related differences in the seasonal variations in the relative leaf water content (RWC), maximum efficiency of PSII photochemistry ( $F_v/F_m$  ratio), and levels of chlorophyll (Chl) a+b and malondialdehyde (MDA) in *P. lentiscus*. Data represent the mean  $\pm$  SE of n=6 individuals. Significant differences between groups were tested by two-way factorial analyses of variance (ANOVA) with time and plant sex as factors. An asterisk indicates significant differences between males and females at a given time point (Student's t-test,  $P < 0.05$ ). NS, not significant.

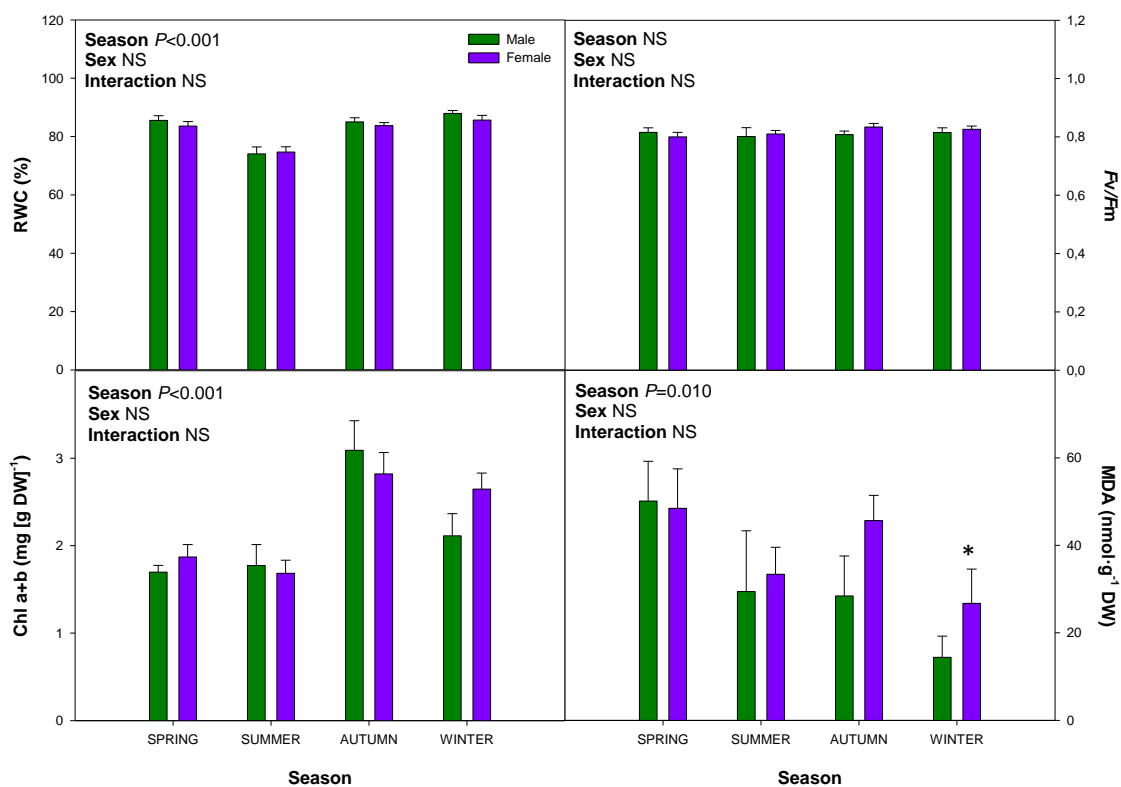

**Fig. S3** Sex-related differences in the seasonal variations in levels of total anthocyanins (Ant), carotenoids (Car) and  $\alpha$ -tocopherol ( $\alpha$ -Toc), expressed per g of dry weight (DW) and per unit of chlorophyll (Chl) a+b in *P. lentiscus*. Data represent the mean  $\pm$  SE of n=6 individuals. Significant differences between groups were tested by two-way factorial analyses of variance (ANOVA) with time and plant sex as factors. An asterisk indicates significant differences between males and females at a given time point (Student's t-test,  $P < 0.05$ ). NS, not significant.

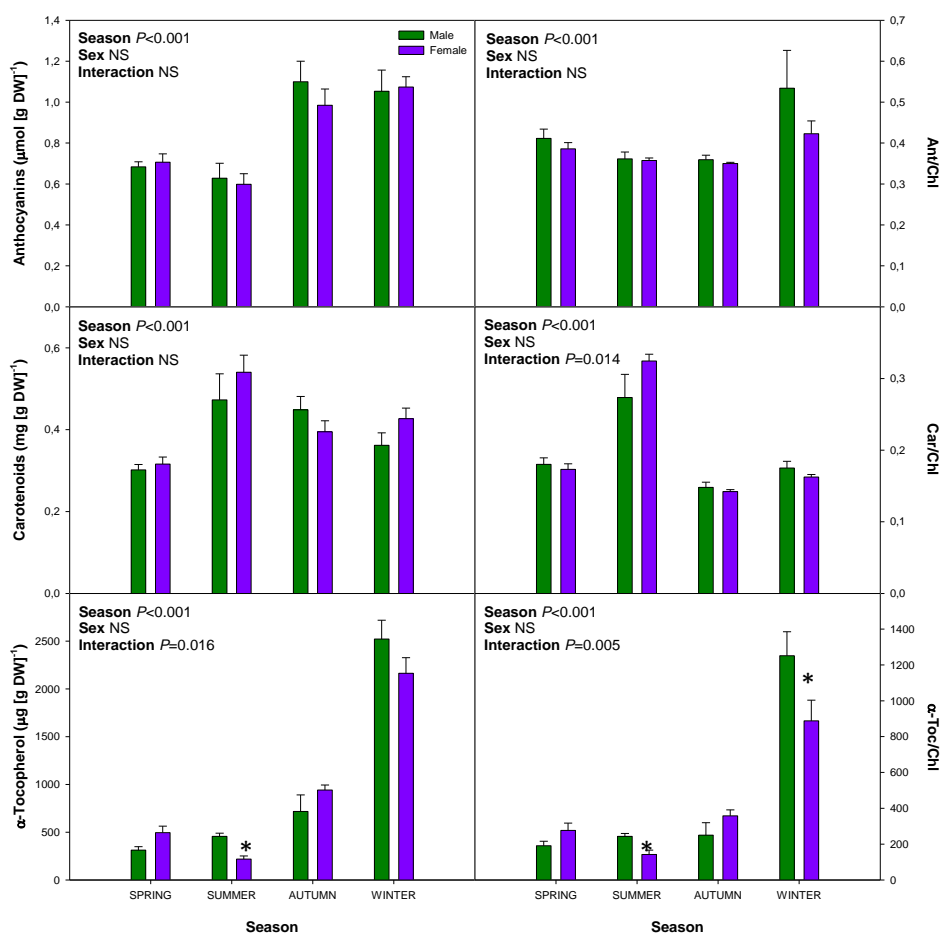

**Fig. S4** Sex-related differences during winter in the relative leaf water content (RWC) of *P. lentiscus*. Data represent the mean  $\pm$  SE of n=6 individuals. Significant differences between groups were tested by two-way factorial analyses of variance (ANOVA) with time and plant sex (females vs. males), shoot (reproductive -R- vs. non-reproductive -NR-) or fruit (shoots with and without fruits) as factors. NS, not significant.

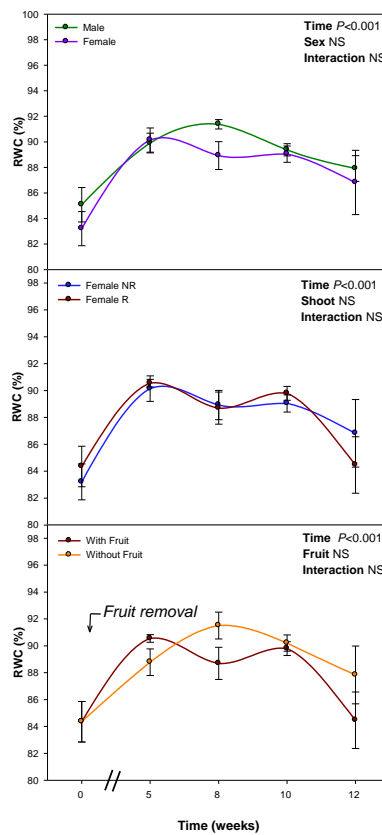

**Fig. S5** Sex-related variations during winter in the levels of total anthocyanins (Ant), carotenoids (Car) and  $\alpha$ -tocopherol ( $\alpha$ -Toc), expressed per unit of chlorophyll (Chl) in *P. lentiscus*. Data represent the mean  $\pm$  SE of n=6 individuals. Significant differences between groups were tested by two-way factorial analyses of variance (ANOVA) with time and plant sex (females vs. males), shoot (reproductive -R- vs. non-reproductive -NR-) or fruit (shoots with and without fruits) as factors. NS, not significant.

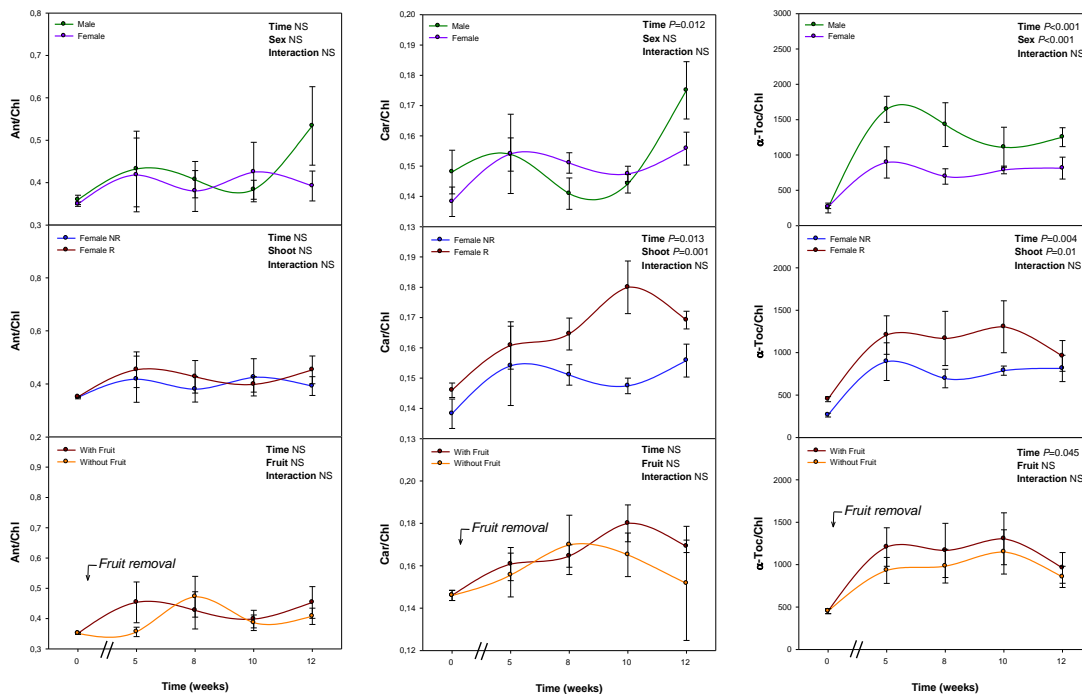

**Fig. S6** Sex-related differences in the diurnal variations in levels of total anthocyanins (Ant), carotenoids (Car) and  $\alpha$ -tocopherol ( $\alpha$ -Toc) in *P. lentiscus* during winter (25 January). Data represent the mean  $\pm$  SE of n=6 individuals. Significant differences between groups were tested by two-way factorial analyses of variance (ANOVA) with time and plant sex (females vs. males), shoot (reproductive -R- vs. non-reproductive -NR-) or fruit (shoots with and without fruits) as factors. An asterisk indicates significant differences between males and females, R and NR shoots, or shoots with and without fruits at a given time point (Student's t-test,  $P < 0.05$ ). NS, not significant.

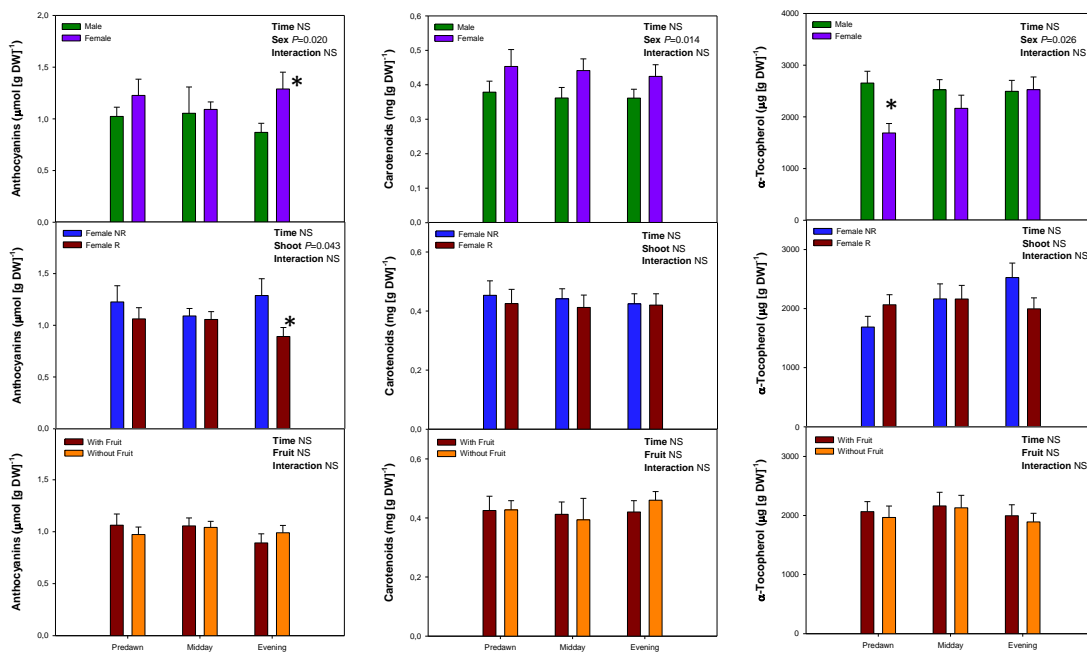

**Fig. S7** Sex-related differences in the diurnal variations in levels of total anthocyanins (Ant), carotenoids (Car) and  $\alpha$ -tocopherol ( $\alpha$ -Toc) expressed per unit of chlorophyll (Chl) in *P. lentiscus* during winter (25 January). Data represent the mean  $\pm$  SE of n=6 individuals. Significant differences between groups were tested by two-way factorial analyses of variance (ANOVA) with time and plant sex (females vs. males), shoot (reproductive -R- vs. non-reproductive -NR-) or fruit (shoots with or without fruits) as factors. An asterisk indicates significant differences between males and females, R and NR shoots, or shoots with and without fruits at a given time point (Student's t-test,  $P < 0.05$ ). NS, not significant.

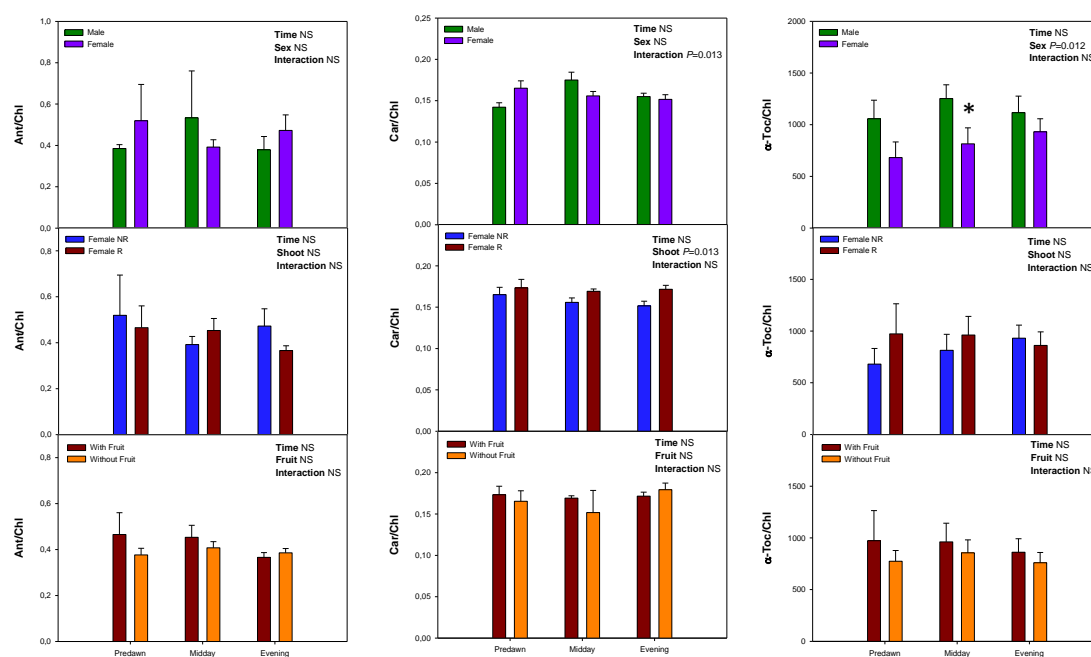



**Fig. S8** Sex-related differences in the diurnal variations in levels zeatin (Z), zeatin riboside (ZR) and 2-isopentenyladenine (2iP) in *P. lentiscus* during winter (25 January). Data represent the mean  $\pm$  SE of n=6 individuals. Significant differences between groups were tested by two-way factorial analyses of variance (ANOVA) with time and plant sex (females vs. males), shoot (reproductive -R- vs. non-reproductive -NR-) or fruit (shoots with or without fruits) as factors. An asterisk indicates significant differences between males and females at a given time point (Student's t-test,  $P < 0.05$ ). NS, not significant.

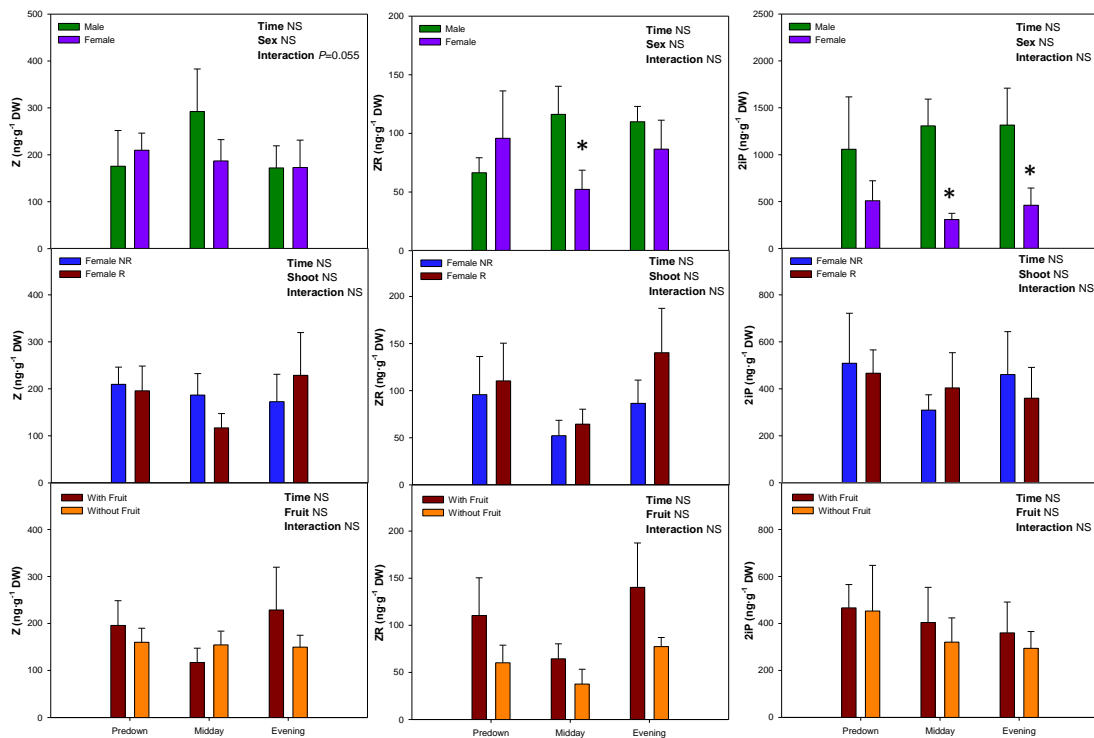

**Fig. S9** Sex-related differences during winter in the instantaneous water use efficiency (WUE) response curves to photosynthetically-active photon flux density (PPFD) in *P. lentiscus*. Data represent the mean  $\pm$  SE of n=6 individuals. Significant differences between groups were tested by two-way factorial analyses of variance (ANOVA) with time and plant sex (females vs. males), shoot (reproductive -R- vs. non-reproductive -NR-) or fruit (shoots with and without fruits) as factors. NS, not significant. Green shading indicates midday sampling PPFD range during winter.

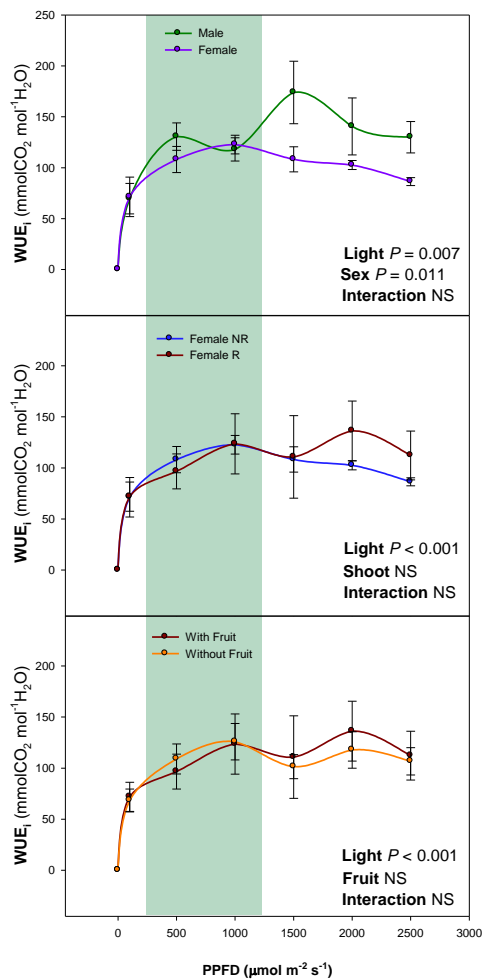

Supplement: supp_ert446_jexbot112524_file001.pdf [file supp_ert446_jexbot112524_file001.pdf]
